# Supplementary material for: Integrative pan cancer analysis reveals epigenomic variation in cancer type and cell specific chromatin domains
Source: PubMed Central journal article supplement (PMC7930052; doi:10.1038/s41467-021-21707-1), 2021-03-03
Supplement: 41467_2021_21707_MOESM2_ESM.pdf [file 41467_2021_21707_MOESM2_ESM.pdf]

## **Description of Additional Supplementary Files**

File Name: Supplementary Data 1

Description: List of NCI-60 cell lines.

File Name: Supplementary Data 2

Description: Cellminer expression of DNA methyltransferases in NCI-60 cells.

File Name: Supplementary Data 3

Description: H3K4me3 cancer-type specific GO terms.

File Name: Supplementary Data 4

Description: TUSON explorer list of all genes with TSG-like properties

File Name: Supplementary Data 5

Description: GREAT GO analysis of super-enhancers.

File Name: Supplementary Data 6

Description: STR profiling of the NCI-60 cell lines.

File Name: Supplementary Data 7

Description: CHIP-Seq samples GSE143653.
